# Supplementary material
Source: MDPI journal article supplement (https://www.mdpi.com/2072-4292/9/6/604)
Supplement: s1 [file s1]

Archive with 2 entries (2 files):
- remotesensing-190331-supplementary material-final.pdf
- Supplementary material (Video S1).mp4
